# Supplementary material for: RNAi-Mediated Silencing of Laccase 2 in Culex pipiens Pupae via Dehydration and Soaking Results in Multiple Defects in Cuticular Development
Source: MDPI journal article supplement (doi:10.3390/insects15030193), 2024-03-14
Supplement: s1 [file s1]

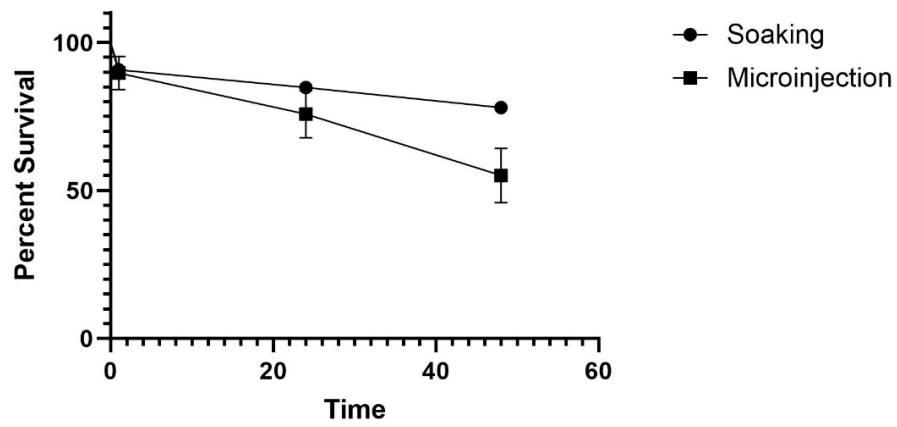

**Figure S1.** Survival of pupae following soaking and microinjections ( $\chi^2=7.700$ ,  $df=1$ ,  $p\text{-value}=0.0055^*$ ). Percent survival pooled across all individuals exposed to each treatment type is shown. Error bars represent  $\pm 1$  SEM.
